# Supplementary material for: Long noncoding RNA LINC00461 induced osteoarthritis progression by inhibiting miR-30a-5p
Source: Aging (Albany NY). 2020 Mar 10;12(5):4111–23. doi: 10.18632/aging.102839 (PMC7093191; doi:10.18632/aging.102839)
Supplement: Supplementary Table 1 [file aging-12-102839-s001..pdf]

SUPPLEMENTARY TABLE

Supplementary Table 1. Clinical features of OA patients.

| Clinicopathological features | Number |
|------------------------------|--------|
| Age (years)                  |        |
| <60                          | 10     |
| ≥60                          | 15     |
| Gender                       |        |
| Male                         | 7      |
| Female                       | 18     |
| Disease duration in months   |        |
| <60                          | 8      |
| ≥60                          | 19     |
| Kellgren-Lawrence stage      |        |
| III                          | 13     |
| IV                           | 12     |
